# Supplementary material for: Analyzing physiological signals recorded with a wearable sensor across the menstrual cycle using circular statistics
Source: Frontiers journal article supplement (doi:10.3389/fnetp.2023.1227228), 2023-10-19
Supplement: Presentation_1.zip [file Presentation_1.zip]

## Supplementary Material

### 1 SUPPLEMENTARY DATA

#### 1.1 Figures

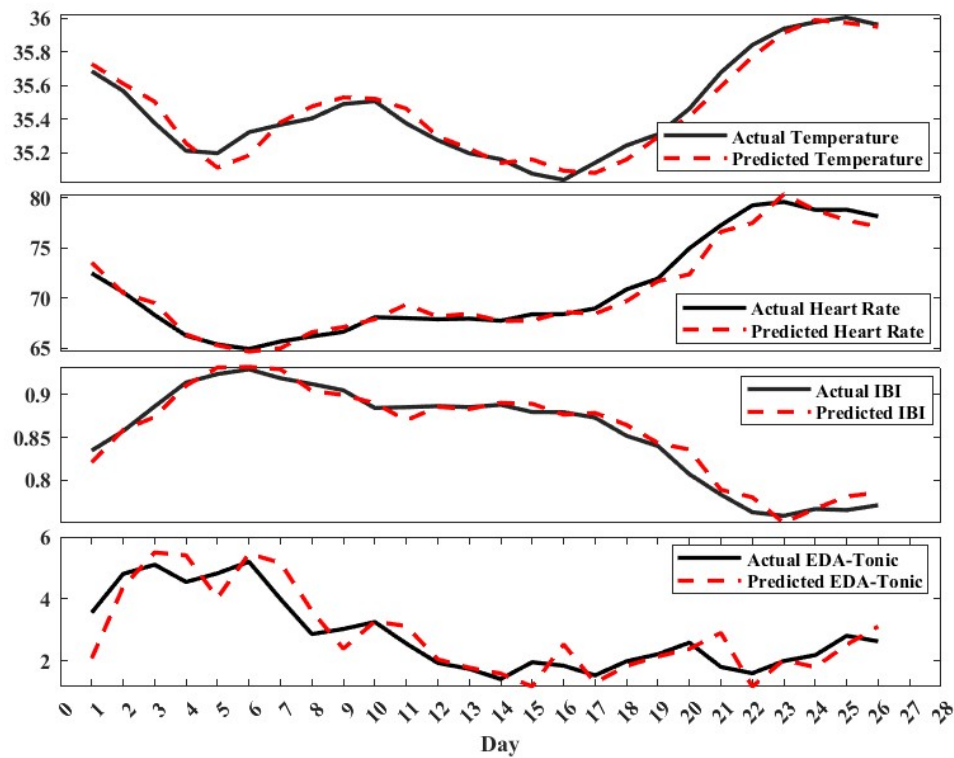

**Figure S1.** The actual and ARIMA predicated average daily values for third cycle of an ovulating subject with length of 26 days with RMSE values of 0.063 (C°), 0.89 (bpm), 0.011 (s), and 0.6 (μS).

#### 1.2 Tables

## Average Heart Rate

| <i>Phase</i>     | <i>p-value</i> |
|------------------|----------------|
| Menses & Mid FH  | **2.388E-04    |
| Menses & OV      | *0.022         |
| Menses & Mid LH  | *0.024         |
| Menses & Late LH | **1.689E-04    |
| Mid FH & OV      | 0.143          |
| Mid FH & Mid LH  | **1.486E-08    |
| Mid FH & Late LH | **4.974E-12    |
| OV & Mid LH      | **1.036E-05    |
| OV & Late LH     | **8.328E-09    |
| Mid LH & Late LH | 0.114          |

**Table S1.** Results for significant changes of average heart rate across 5 phases of the menstrual cycle (*Menses*, *Mid-follicular*, *Ovulation*, *Midluteal*, and *Late luteal*),  $n = 31$  cycles using a paired t-test with a Bonferroni correction. **Note:** \*\* $\alpha \leq 0.005$ , \* $0.05 \geq \alpha > 0.005$ .

## Average Inter-beat Interval

| <i>Phase</i>     | <i>p-value</i> |
|------------------|----------------|
| Menses & Mid FH  | **3.309E-05    |
| Menses & OV      | *0.009         |
| Menses & Mid LH  | 0.054          |
| Menses & Late LH | **5.325E-05    |
| Mid FH & OV      | 0.101          |
| Mid FH & Mid LH  | **6.203E-09    |
| Mid FH & Late LH | **5.951E-14    |
| OV & Mid LH      | **1.031E-05    |
| OV & Late LH     | **3.343E-10    |
| Mid LH & Late LH | *0.027         |

**Table S2.** Same as table S1 except for average inter-beat-interval. **Note:** \*\* $\alpha \leq 0.005$ , \* $0.05 \geq \alpha > 0.005$ .

## Average Temperature

| <i>Phase</i>     | <i>p-value</i> |
|------------------|----------------|
| Menses & Mid FH  | *0.013         |
| Menses & OV      | **0.003        |
| Menses & Mid LH  | **1.779E-06    |
| Menses & Late LH | **6.360E-09    |
| Mid FH & OV      | 0.644          |
| Mid FH & Mid LH  | **9.809E-12    |
| Mid FH & Late LH | **1.421E-14    |
| OV & Mid LH      | **8.615E-13    |
| OV & Late LH     | **1.110E-15    |
| Mid LH & Late LH | 0.221          |

**Table S3.** Same as table S1 except for average temperature. **Note:** \*\* $\alpha \leq 0.005$ , \* $0.05 \geq \alpha > 0.005$ .

### Average EDA Tonic Component

| <i>Phase</i>     | <i>p-value</i> |
|------------------|----------------|
| Menses & Mid FH  | **0.001        |
| Menses & OV      | **1.401E-08    |
| Menses & Mid LH  | **4.132E-08    |
| Menses & Late LH | **3.009E-04    |
| Mid FH & OV      | **0.005        |
| Mid FH & Mid LH  | *0.010         |
| Mid FH & Late LH | 0.640          |
| OV & Mid LH      | 0.819          |
| OV & Late LH     | *0.020         |
| Mid LH & Late LH | *0.035         |

**Table S4.** Same as table S1 except for average EDA tonic component. **Note:**  $**\alpha \leq 0.005$ ,  $*0.05 \geq \alpha > 0.005$ .

### Average SMA of the Phasic Component

| <i>Phase</i>     | <i>p-value</i> |
|------------------|----------------|
| Menses & Mid FH  | *0.007         |
| Menses & OV      | **1.221E-08    |
| Menses & Mid LH  | **9.306E-07    |
| Menses & Late LH | **4.306E-04    |
| Mid FH & OV      | **0.001        |
| Mid FH & Mid LH  | *0.017         |
| Mid FH & Late LH | 0.384          |
| OV & Mid LH      | 0.347          |
| OV & Late LH     | *0.014         |
| Mid LH & Late LH | 0.123          |

**Table S5.** Same as table S1 except for the EDA signal magnitude area of the phasic component. **Note:**  $**\alpha \leq 0.005$ ,  $*0.05 \geq \alpha > 0.005$ .
